# Supplementary material for: Feline calicivirus and other respiratory pathogens in cats with Feline calicivirus-related symptoms and in clinically healthy cats in Switzerland
Source: PubMed Central journal article supplement (PMC4644299; doi:10.1186/s12917-015-0595-2), 2015-11-13
Supplement: 12917_2015_595_MOESM1_ESM.pdf [file 12917_2015_595_MOESM1_ESM.pdf]

**Additional file 1: Number of cats PCR-positive for UR TD-associated pathogens and co-infections thereof. The 200 FCV-suspect and 100 healthy cats originated from 19 different cantons in Switzerland.**

| FCV | (RT-) qPCR-positive for |       |                 |                           | Number of cats             |                        |
|-----|-------------------------|-------|-----------------|---------------------------|----------------------------|------------------------|
|     | <i>M. felis</i>         | FHV-1 | <i>C. felis</i> | <i>B. bronchi-septica</i> | FCV-suspect cats (n = 200) | Healthy cats (n = 100) |
| +   | +                       | +     | +               | +                         | 0                          | 0                      |
| +   | +                       | +     | +               | -                         | 1                          | 0                      |
| +   | +                       | +     | -               | +                         | 0                          | 0                      |
| +   | +                       | +     | -               | -                         | 11                         | 0                      |
| +   | +                       | -     | +               | +                         | 1                          | 0                      |
| +   | +                       | -     | +               | -                         | 1                          | 1                      |
| +   | +                       | -     | -               | +                         | 2                          | 0                      |
| +   | +                       | -     | -               | -                         | 34                         | 4                      |
| +   | -                       | +     | +               | +                         | 0                          | 0                      |
| +   | -                       | +     | +               | -                         | 0                          | 0                      |
| +   | -                       | +     | -               | +                         | 1                          | 0                      |
| +   | -                       | +     | -               | -                         | 4                          | 0                      |
| +   | -                       | -     | +               | +                         | 0                          | 0                      |
| +   | -                       | -     | +               | -                         | 2                          | 0                      |
| +   | -                       | -     | -               | +                         | 0                          | 1                      |
| +   | -                       | -     | -               | -                         | 32*                        | 2                      |
| -   | +                       | +     | +               | +                         | 0                          | 0                      |
| -   | +                       | +     | +               | -                         | 0                          | 0                      |
| -   | +                       | +     | -               | +                         | 1                          | 0                      |
| -   | +                       | +     | -               | -                         | 10                         | 8                      |
| -   | +                       | -     | +               | +                         | 0                          | 0                      |
| -   | +                       | -     | +               | -                         | 6                          | 0                      |
| -   | +                       | -     | -               | +                         | 0                          | 0                      |
| -   | +                       | -     | -               | -                         | 27                         | 18                     |
| -   | -                       | +     | +               | +                         | 0                          | 0                      |
| -   | -                       | +     | +               | -                         | 1                          | 0                      |
| -   | -                       | +     | -               | +                         | 2                          | 0                      |
| -   | -                       | +     | -               | -                         | 9**                        | 1                      |
| -   | -                       | -     | +               | +                         | 1                          | 0                      |
| -   | -                       | -     | +               | -                         | 3                          | 0                      |
| -   | -                       | -     | -               | +                         | 0                          | 1                      |
| -   | -                       | -     | -               | -                         | 51                         | 64                     |

\* Contains two FCV-suspect cats, which could not be tested for *B. bronchiseptica* and *M. felis* because of a lack of material. \*\* Contains one FCV-suspect cat, which could not be tested for *B. bronchiseptica* and *M. felis* because of a lack of material.
