# Supplementary material for: Feline calicivirus and other respiratory pathogens in cats with Feline calicivirus-related symptoms and in clinically healthy cats in Switzerland
Source: PubMed Central journal article supplement (PMC4644299; doi:10.1186/s12917-015-0595-2), 2015-11-13
Supplement: 12917_2015_595_MOESM3_ESM.pdf [file 12917_2015_595_MOESM3_ESM.pdf]

**Additional file 3: Details on missing values, univariable regressions with complete case and imputed data sets**

| Parameter                          | FCV-suspect<br>(n = 200) |         | FCV-suspect,<br>complete<br>(n = 168) | FCV-suspect,<br>imputed<br>(n = 200) | Healthy<br>(n = 100) |         | Healthy,<br>complete<br>(n = 88) | Healthy, imputed<br>(n = 100) |
|------------------------------------|--------------------------|---------|---------------------------------------|--------------------------------------|----------------------|---------|----------------------------------|-------------------------------|
|                                    | p-value                  | missing | p-value                               | p-value                              | p-value              | missing | p-value                          | p-value                       |
| Age                                | 0.12                     | -       | 0.03                                  | 0.12                                 | 0.70                 | 1       | 0.76                             | 0.71                          |
| Sex                                | 0.38                     | -       | 0.42                                  | 0.38                                 | 0.51                 | -       | 0.45                             | 0.51                          |
| Intact reproductive status         | 0.02                     | -       | 0.03                                  | 0.02                                 | 0.02                 | -       | 0.01                             | 0.02                          |
| Pedigree                           | 0.87                     | -       | 0.98                                  | 0.87                                 | 0.28                 | -       | 0.35                             | 0.28                          |
| Multi-cat household                | 0.09                     | 6       | 0.11                                  | 0.08                                 | 0.17                 | -       | 0.17                             | 0.17                          |
| Group housing with ≥ 4 cats        | 0.008                    | 6       | 0.009                                 | 0.009                                | < 0.001              | 4       | < 0.001                          | < 0.001                       |
| Outdoor access                     | 0.19                     | 1       | 0.17                                  | 0.17                                 | 0.23                 | -       | 0.387                            | 0.23                          |
| Vaccinated                         | 0.03                     | 8       | 0.03                                  | 0.029                                | 0.57                 | 2       | 0.67                             | 0.55                          |
| Primary Immunization ‡             | 0.03                     | 18      | 0.04                                  | 0.039                                | 0.83                 | 8       | 1.00                             | 0.86                          |
| Immunosuppressive therapy          | 0.40                     | -       | 0.90                                  | 0.399                                | 0.995                | -       | 1.00                             | 1.00                          |
| Antibiotic therapy                 | 0.26                     | -       | 0.32                                  | 0.256                                | 0.99                 | -       | 0.99                             | 0.99                          |
| Antivirale Therapy                 | 0.51                     | 1       | 0.52                                  | NA <sup>†</sup>                      | NA <sup>†</sup>      | -       | NA <sup>†</sup>                  | NA <sup>†</sup>               |
| FHV-1 positive*                    | 0.77                     | -       | 0.82                                  | 0.776                                | 0.99                 | -       | 0.99                             | 0.99                          |
| <i>C. felis</i> positive*          | 0.27                     | -       | 0.43                                  | 0.27                                 | 0.99                 | -       | 0.99                             | 0.99                          |
| <i>B. bronchiseptica</i> positive* | 0.74                     | 3       | 0.58                                  |                                      | 0.99                 | -       | 0.99                             | 0.99                          |
| <i>M. felis</i> positive*          | 0.02                     | 3       | 0.13                                  | 0.019                                | 0.06                 | -       | 0.07                             | 0.06                          |

‡ Primary immunization defined as two subsequent vaccinations within 2 to 6 weeks with the same vaccine strain. † Not applicable. \* Positive by PCR / RT-PCR.
